# Supplementary material for: Macrophage Migration Inhibitory Factor (MIF) Promotes Increased Proportions of the Highly Permissive Th17-like Cell Profile during HIV Infection
Source: MDPI journal article supplement (doi:10.3390/v14102218), 2022-10-09
Supplement: s1 [file s1]

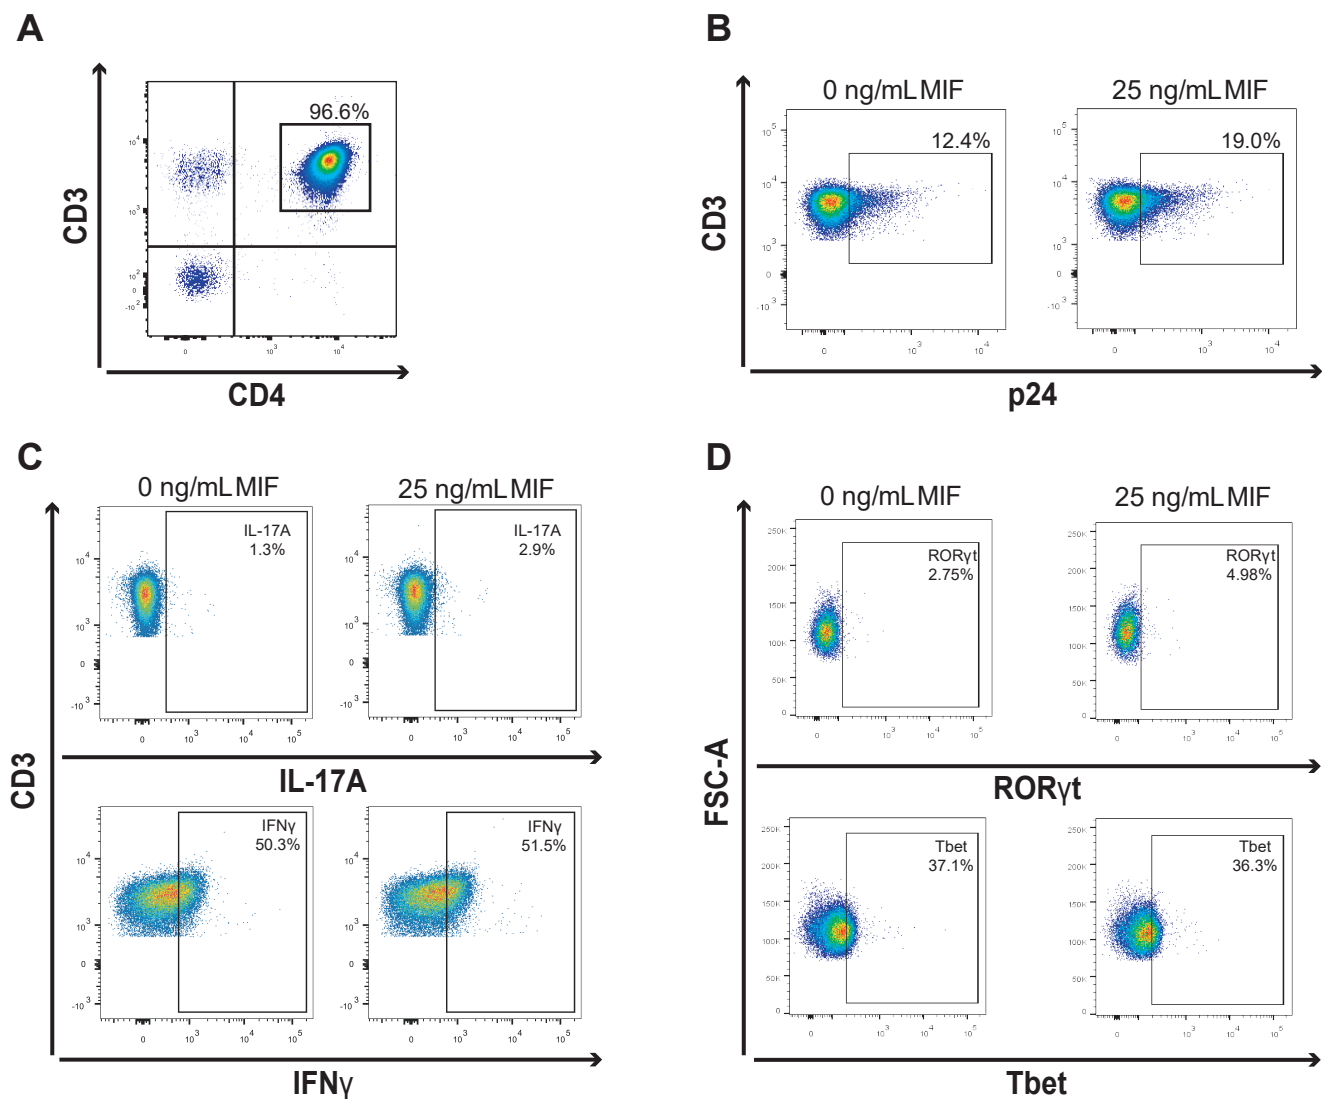

Figure S1: Representative gating of (A) CD4 T cells and (B) p24 staining of CD4 T cells co-cultured with infected MDMs treated and untreated with MIF. (C,D) Expression of cytokines IL-17A and IFN- $\gamma$  and transcription factors ROR $\gamma$ t and Tbet in CD4<sup>+</sup> T lymphocytes co-cultured with HIV-infected MDMs for 5 days in the presence of MIF (25 ng/mL) or not. Dot plots from one representative experiment are shown.
